# Supplementary material
Source: PubMed Central journal article supplement (PMC2998560)
Supplement: NIHMS243909-supplement-Supp_Fig_s1-s3___Table_s1-3.pdf [file NIHMS243909-supplement-Supp_Fig_s1-s3___Table_s1-3.pdf]

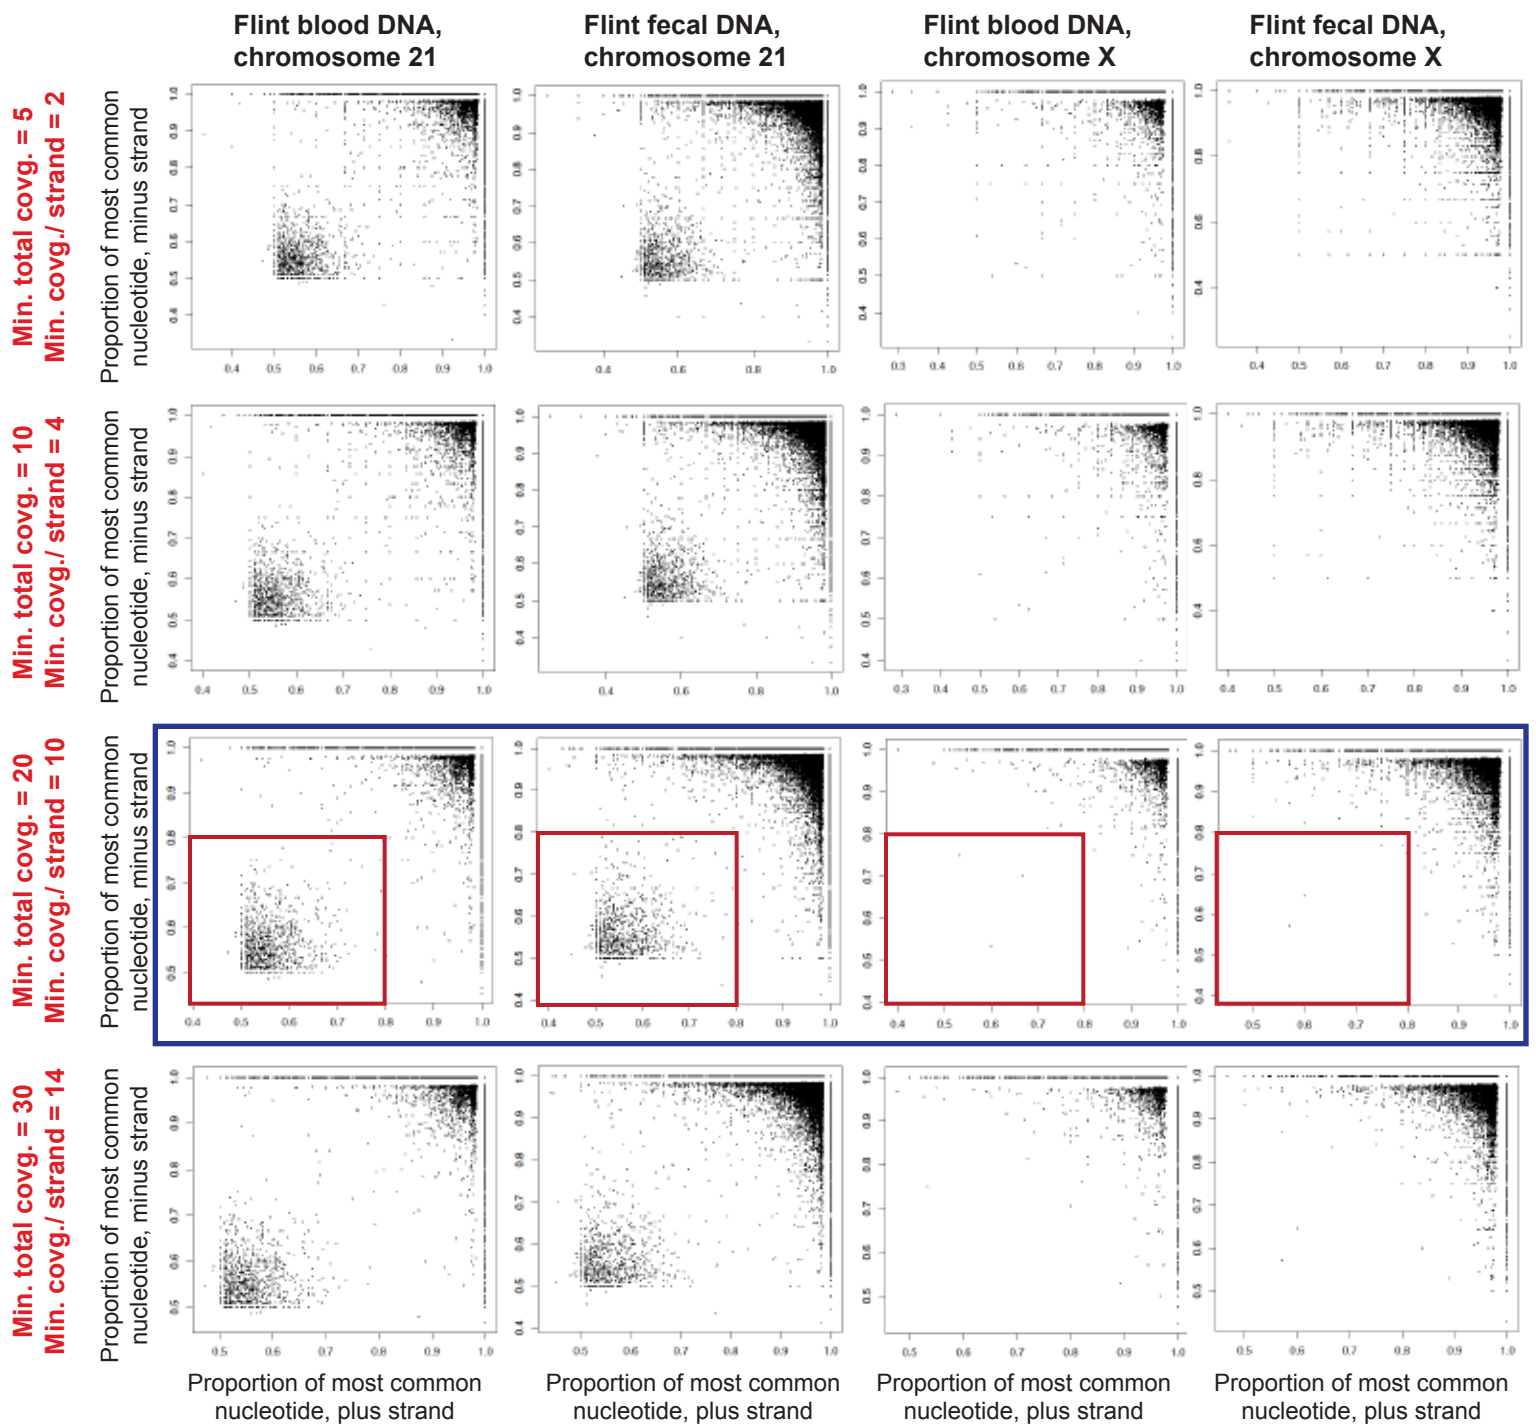

**Fig S1. Heterozygous site single nucleotide polymorphism identification criteria.**

After sub-sampling the reads to include only one read mapped to each start position per strand to avoid post-adaptor ligation and post-capture amplification biases, we evaluated the SNP calling properties of different read coverage criteria, using iterations of total filtered read coverage per base, strand-specific filtered read coverage per base, and proportion of the most common nucleotide per site on each strand. Shown are plots of the most common nucleotide proportion on the forward strand (X axis) and reverse strand (Y axis) at each site for a selected sample of the iterated coverage cutoffs (the overwhelming majority of sites have most common nucleotide proportions of 1.0 on each strand), on chromosome 21 and X from the blood and fecal DNA sequence data from Flint, 93A009, a male chimpanzee. We sought to maximize the accuracy in SNP calling while minimizing the numbers of sites that could not be analyzed due to insufficient coverage. For our final heterozygous site SNP identification criteria (enclosed by blue box), we considered sites covered by a minimum of 10 reads from each strand (total minimum 20), and identified heterozygous SNPs as the sites where the most common nucleotide proportion was  $\leq 0.8$  on both strands (red box).

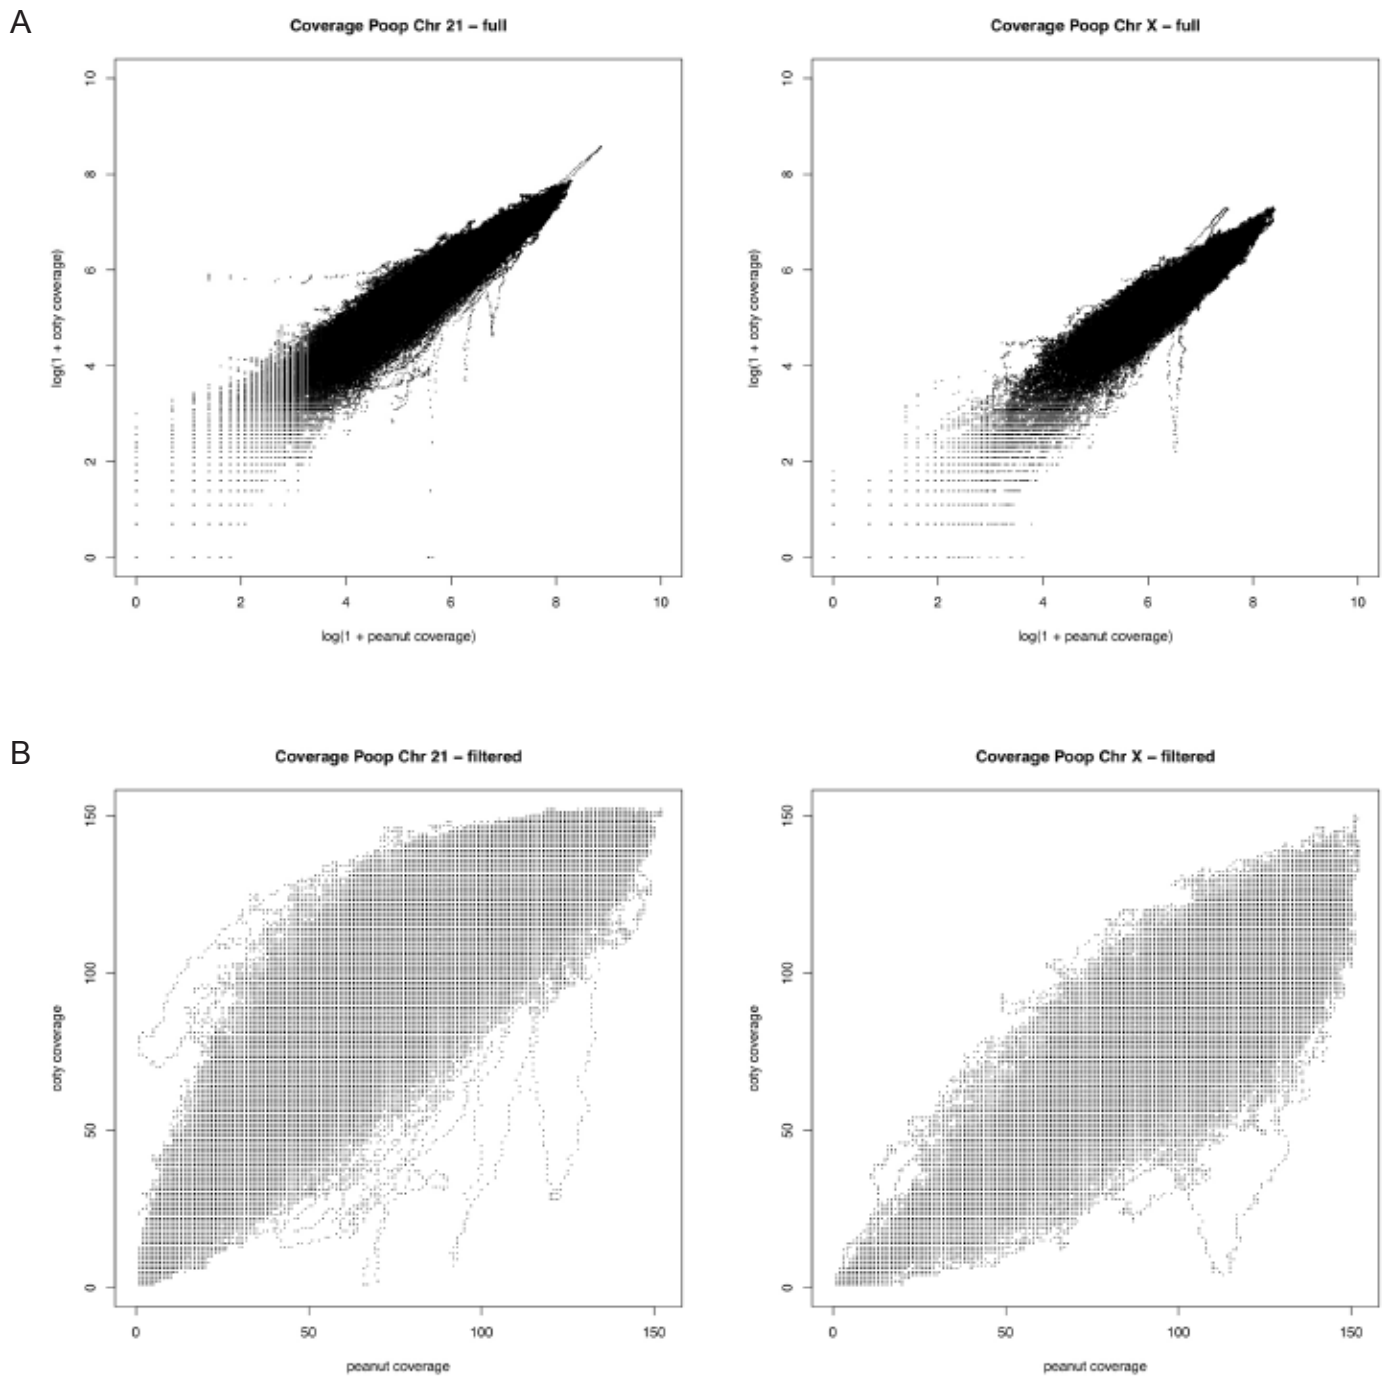

**Fig S2. Sequence coverage correspondence.**

Two sample per site sequence read coverage comparisons, for Peanut fecal DNA (*x*-axis) and Coty fecal DNA (*y*-axis), which exemplify the results observed across all samples. (A) Total coverage, without filtering. (B) Coverage after sub-sampling one read for each start position and strand (maximum filtered coverage = 152/bp; 76 bp reads x 2 strands) to avoid potential post-ligation and post-capture amplification biases. A small proportion of sites have low filtered coverage, but these positions tend to be the same across samples. Therefore, sites with insufficient coverage for SNP identification are often in common across samples rather than random.

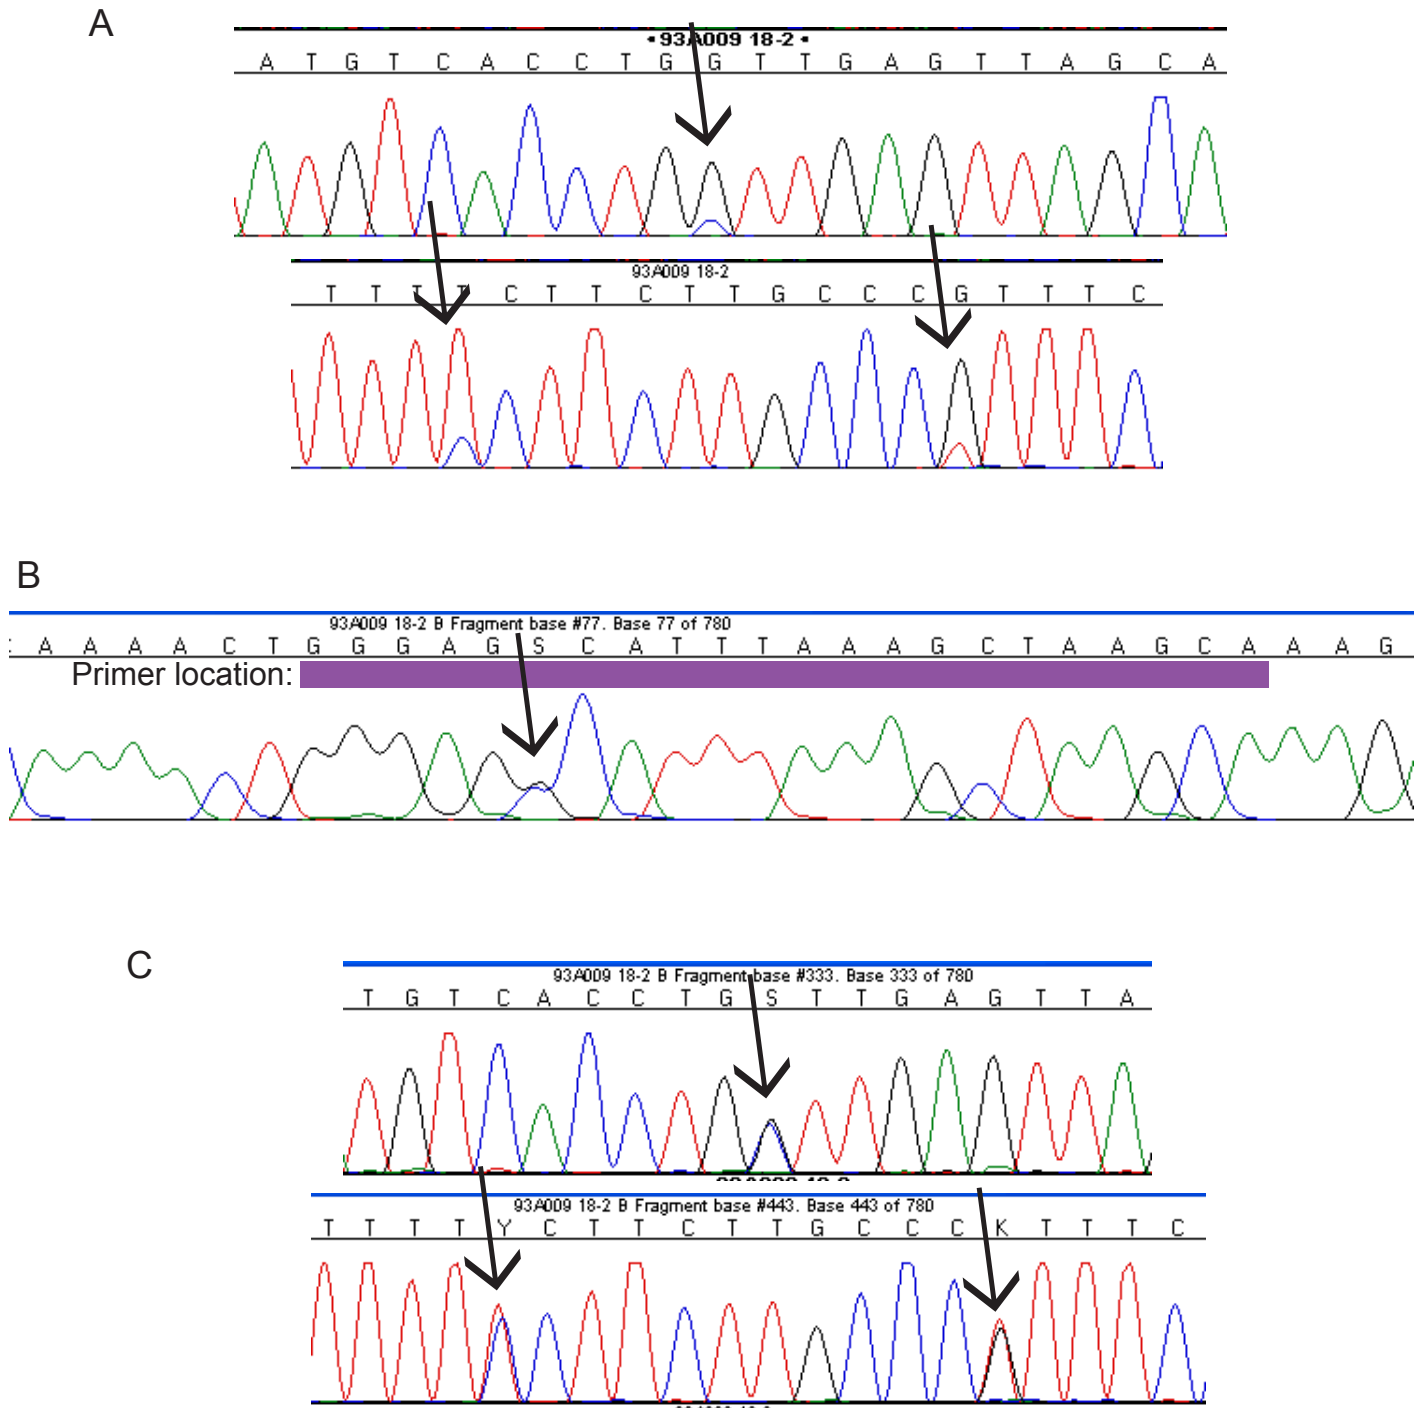

**Fig S5. Validation of identified single nucleotide polymorphisms by PCR and Sanger sequencing.** We used PCR and Sanger sequencing to analyze 20 of the regions we targeted with the SureSelect capture library and sequenced on the Illumina Genome Analyzer Ix. (A) In one of the regions, we had identified heterozygous sites from analysis of the GAllx data that were not confirmed by the Sanger sequencing data, indicated by arrows on chromatograms. However, the GAllx data also indicated a SNP at the same genome position as the forward primer, suggesting the possibility of allele-specific PCR. We designed a different forward primer, upstream of the original forward primer. (B) Chromatogram from sequencing reaction using the second amplified product, with the original primer sequence indicated, and the heterozygous site suggested by the GAllx data (arrow) confirmed. (C) Chromatograms from sequencing reactions that used the second amplified product, confirming the GAllx-predicted heterozygous sites.

**Table S1.** Sequencing statistics summary.

| Individual             | Source | Prop. Endog. <sup>1</sup> | Total reads | Chromosome 21                        |                      |                                |                                          | Chromosome X                         |                      |                                |                                          | Mitochondrial genome                 |                                          |
|------------------------|--------|---------------------------|-------------|--------------------------------------|----------------------|--------------------------------|------------------------------------------|--------------------------------------|----------------------|--------------------------------|------------------------------------------|--------------------------------------|------------------------------------------|
|                        |        |                           |             | Reads mapped to targets <sup>2</sup> | Enrich. <sup>3</sup> | Effective enrich. <sup>4</sup> | Mean(±sd) filtered coverage <sup>5</sup> | Reads mapped to targets <sup>2</sup> | Enrich. <sup>3</sup> | Effective enrich. <sup>4</sup> | Mean(±sd) filtered coverage <sup>5</sup> | Reads mapped to targets <sup>2</sup> | Mean(±sd) filtered coverage <sup>5</sup> |
| 93A009 Flint (male)    | Blood  | NA                        | 31.3M       | 9,563,180                            | 3,454                | (3,454)                        | 85 (15.9)                                | 2,604,801                            | 2,753                | (2,753)                        | 55 (12.5)                                | 6,699,099                            | 147 (20.7)                               |
|                        | Fecal  | 0.009                     | 27.5M       | 6,596,350                            | 2,238,909            | 20,150                         | 88 (23.7)                                | 2,052,414                            | 401,293              | 3,612                          | 60 (17.1)                                | 15,319,420                           | 146 (22.6)                               |
| 91A010 Peanut (female) | Blood  | NA                        | 30.1M       | 9,430,361                            | 5,198                | (5,198)                        | 113 (20.4)                               | 5,131,528                            | 4,307                | (4,307)                        | 115 (23.1)                               | 7,117,730                            | 146 (21.4)                               |
|                        | Fecal  | 0.052                     | 31.8M       | 9,027,939                            | 680,940              | 35,409                         | 93 (33.2)                                | 7,006,967                            | 434,395              | 22,589                         | 110 (28.7)                               | 14,190,809                           | 148 (17.9)                               |
| A2A009 Sopulu (male)   | Blood  | NA                        | 26.9M       | 9,717,238                            | 5,783                | (5,783)                        | 110 (17.1)                               | 2,573,133                            | 4,356                | (4,356)                        | 76 (15.7)                                | 7,581,089                            | 149 (16.5)                               |
|                        | Fecal  | 0.006                     | 31.7M       | 8,195,055                            | 1,390,768            | 8,345                          | 67 (15.8)                                | 2,698,919                            | 395,773              | 2,375                          | 42 (10.4)                                | 19,366,060                           | 149 (16.3)                               |
| X161 Judd (male)       | Blood  | NA                        | 26.6M       | 9,714,466                            | 4,784                | (4,784)                        | 103 (15.3)                               | 2,514,313                            | 3,483                | (3,483)                        | 67 (13.7)                                | 6,433,830                            | 149 (16.3)                               |
|                        | Fecal  | 0.015                     | 31.9M       | 11,288,033                           | 1,915,672            | 28,735                         | 114 (26.3)                               | 3,832,523                            | 347,908              | 5,219                          | 90 (20.9)                                | 15,567,341                           | 149 (15.2)                               |
| 91A016 Coty (male)     | Blood  | NA                        | 30.8M       | 11,274,746                           | 5,044                | (5,044)                        | 110 (16.7)                               | 3,047,723                            | 4,149                | (4,149)                        | 76 (15.2)                                | 7,415,030                            | 146 (22.8)                               |
|                        | Fecal  | 0.021                     | 30.8M       | 7,516,434                            | 1,133,867            | 23,811                         | 113 (31.3)                               | 2,510,573                            | 368,809              | 7,745                          | 95 (26.4)                                | 19,894,407                           | 148 (21.2)                               |
| A1A005 Kierra (female) | Blood  | NA                        | 27.4M       | 8,054,414                            | 6,048                | (6,048)                        | 103 (16.7)                               | 4,272,446                            | 4,473                | (4,473)                        | 103 (19.4)                               | 8,797,339                            | 147 (21.7)                               |
|                        | Fecal  | 0.005                     | 28.3M       | 3,978,701                            | 1,353,830            | 6,769                          | 54 (13.7)                                | 2,454,901                            | 479,987              | 2,400                          | 58 (13.3)                                | 20,923,666                           | 147 (23.2)                               |

**Notes:**

<sup>1</sup> Estimated proportion of endogenous DNA out of total in fecal DNA extract, based on quantitative PCR, using primers unique in the chimpanzee nuclear genome (forward 5'-3' CAATCAAGACGTCCAGCTCA and reverse 5'-3' TAGAACTGCTGCCCACTTT), evaluated against a standard curve constructed from the blood DNA of one individual (Flint, 93A009). The samples were run in 25 µL reactions using iQ SYBR Green Supermix (Bio-Rad) on a Bio-Rad iCycler Thermal Cycler with an initial denaturation of 95°C for 7 min, followed by 40 cycles of 95°C for 30 sec and 60°C for 45 sec. Test samples were run in triplicate and standards run in duplicate.

<sup>2</sup> Number of reads mapped uniquely to targeted regions on chimpanzee chromosome 21 (total size of targeted regions = 1,052,310 bp), chromosome X (total size of targeted regions = 550,471 bp), and the mitochondrial genome (total size of targeted region = 16,554 bp). The mapped read data for the mitochondrial genome are provided for informational purposes but these results were not used for analyses. Instead, due to the extreme variability in the hypervariable region, we performed *de novo* assembly of the complete mitochondrial genome sequence for each individual (see *Materials and Methods*).

<sup>3</sup> Enrichment of targeted regions in the sequence data. The number of reads mapped to targeted regions, per base, compared to the number of reads mapped to regions of the same chromosomes that were not targeted but that met the same filtering criteria for region selection (i.e., regions that were not targeted only because we were limited to 55,000 SureSelect baits), per base. Total size of chromosome 21 non-targeted regions = 1,428,685 bp. Total size of chromosome X non-targeted regions = 4,197,550 bp.

<sup>4</sup> Effective enrichment for the fecal DNA samples, accounting for the fact that endogenous DNA is overwhelmed by DNA from exogenous sources in these samples. Calculated as the estimated proportion of endogenous DNA times the enrichment of targeted regions in the sequence data.

<sup>5</sup> To avoid the possibility of analyzing multiple reads representing copies of the same original DNA fragment from amplification following adapter ligation and capture, we sub-sampled one read mapped to each position on each strand. After filtering, maximum coverage is 152x (76 bp x 2 directions).

**Table S2.** PCR amplification and sequencing primers.

| Targeted Region         | Forward primer          | Reverse primer           | Sequencing primer     | Sequencing primer     | Sequencing primer     | Comments                            |
|-------------------------|-------------------------|--------------------------|-----------------------|-----------------------|-----------------------|-------------------------------------|
| chr21:14581134-14583181 | TGGGTGTGATCAGAGAAATTCG  | TTCAAATGCTGGAGGACAACAT   | GTATTCAACAAAAAATTAAT  | AGATCAGAATATACCGTTAT  | CTTAATGGAGTATACGTC    |                                     |
| chr21:14954854-14957395 | CCCAAGTTGCACAGGAATGTAA  | TTTGATGCTTTGCAGTGTITCC   | TGAGCCTAAAAGTTGCCAGG  | ATACATTTCCAATCTCGTA   | CTTCCATTGCAGCGGTGCT   |                                     |
| chr21:15616780-15620018 | GTTTCCCAAAGGATGTGGAG    | GCAGCGAGCAGTAAAGTGAAA    | TGTAGAGATTAATATGACC   | GATAAATGCTTTGAAATCC   | TTTCTGGCTTCTGAACITTT  |                                     |
| chr21:15808718-15810929 | CAGCAGCTGAACCTCCATTG    | TGCAAAATCAAGCAGGAAATA    | CAGCCTCATGCCAACCTAT   | TCACAAAAAGGGATTATCC   | AAACCCAGCCGAAGAGATG   |                                     |
| chr21:16394928-16397206 | CTCAGTCCCTGAATTGTAGCC   | ATGGGCCAGTTACACTTTTCG    | ACAACCTATGCCAACCTCT   | GCATAGCTGAGGTTTGTCTA  | TTGGAAGCCTGTAAGGGCA   |                                     |
| chr21:17372538-17376963 | GACACACAACCTTAGGGGCACA  | AGGACACAGCGGTAGGAAGAG    | AAAATCAACCACAATTC     | TGGTATTCAACAATTTTC    | TTACCAAAATAGGAATTC    |                                     |
| chr21:17379485-17381556 | AAGATGGCCATTGATACAATGAT | TGGAAGTCCCCTGTTAGAAAAT   | TGATAGCATCAGACTGATAT  | GAAGGTTAACCTAATAGGAG  | TTCTAAAAATAGAAAATCATA |                                     |
| chr21:18358191-18360757 | TGGACCAAAATTCGACGATAAG  | TTTGTTCACCTCTGCTCTCTGC   | TGCATTATTTTTAATATA    | AAACAGAATGCCAGACTTT   | CTGTAAATTTGTTGAGATTT  |                                     |
| chr21:18448806-18451503 | GCAAAGACCCCTCAGGAAGAGAA | CGATTCTCGCTTCTGTCATAA    | TCTCCATAATTTCTCTCCTT  | TGTAGGAATCCAACATTTT   | AATATAGTGGACAGGACACT  |                                     |
| chr21:18838327-18840462 | GACCATGAAAGTTTGGGCAGTT  | AAGCCCATIATCCACTCCTGA    | TACACATATACACATAAG    | AAAAATAAAATCTCTGGAG   | TTAATCTTACAAACATAGA   |                                     |
| chr21:19639278-19642238 | AAAGTGTAAAGCCAGGTTTGGGA | GATGCACCTGATGAGTGAGAG    | CTTTAAGTCACTAATACATCT | CTATTAAATAAAATACATAT  | TTCAATGCAGAGCAGCATGTT |                                     |
| chr21:20148439-20150927 | GAGGGAAAGGTGATGTGGAGT   | TGCTGGACTTACTCTTGCTTCC   | GTCTTGCTGAGATGTAAAGAT | GACAGT TTAAGATTTGACAA | AAATATTGCTATTTTAAAGT  | rev primer also used for seq        |
| chr21:20274315-20276408 | GCCTCTCCAACITTTGTTTGTCT | CAACGAAACAGCAITTTCCATAGG | TGAAAAGCAAATTCATCTTT  | ACATTGGCAATAAGCACATC  | TTTTTGTATATTTTAAAGTA  |                                     |
| chr21:23681637-23683647 | GGCTGGCAGCTTCAATTAATTA  | GCTCCTGATTTACCACAATGG    | TACTCACCAGCAAATGACAC  | TGCCAAATGTAATACCTGTG  | CATTCTGAGGAAAATCAGCA  |                                     |
| chr21:25129118-25131720 | CACAGTATTGGTTCTCTGCTC   | GA AACCCACCAITTTCTGGGAAG | TATCACCTCGAAATAAGAC   | TAAACAATACTACATAGT    | ATCACAGATCATTTCCTCAG  |                                     |
| chr21:26735998-26740725 | TCAGCCACTATTTTGAAGGCA   | TGAGCCGTTGGGACCTATACT    | TGAAGGAGTTGTAAGGTAA   | AGGATAGGCCAGGAGCTGA   | GAGGAAAATTCAGCAGTTGA  | rev primer also used for seq        |
| chr21:28246952-28250384 | AGCAGGCCACAACTGGTTATT   | TGGACATTCCTAAGGAGGGAAA   | ATAACTATATACATAGTTAT  | TAAGTCTCTCATGCATCTTT  | AATTCAACCACTAATTTCT   |                                     |
| chr21:29277494-29281233 | TGTTGGTTGCTTTGACCTCTGT  | CTCACCTTCTCACATGCTATC    | ACTCTCTCTCTTGTCTCAA   | ATAATACCAGCATTAGACAT  | TACTTCTGCTCCATCTCTG   | for & rev primers also used for seq |
| chr21:29376239-29378749 | GCAAAAGCTGAGAAACAATCAGG | TCCCAGAAATTAACAAGGCAACT  | CAAAAGAGTACTATATAGCT  | CAGTCAAGAAATAATCTCTGG | CCCCCTGCTCAAGATACAGT  | region highlighted in Fig S3        |
| chr21:29407059-29409188 | AGCTCATCACTTCCCTCTTTGG  | CAAAGCCAGTGGGAGGAAGAAC   | TTCTAATTAAGGACTAATC   | TTCTATGTTACAATACAAA   | GCAACCACTAAGGTGGTAA   |                                     |

**Notes:**

All primers reported in 5' to 3' sequence

Amplification primers are located within the targeted regions.

PCR reactions: 25 ul with 25 ng blood DNA, 2 mM MgCl<sub>2</sub>, 0.2 uM dNTPs, 0.4 uM each primer, 1 unit Platinum Taq (Invitrogen), 1X Platinum Taq Buffer.

Conditions: 95C for 2 min followed by 40 cycles of 95C for 30 sec, 62C for 30 sec, and 72C for 2 min, in a Bio-Rad DNA Engine Peltier Thermal Cycler.

**Table S3.** Sample-level heterozygosity, for sites with coverage sufficient for SNP identification from both fecal and blood DNA results for each individual.

| Individual             | Source | Chromosome 21           |                    |                        | Chromosome X            |                    |                        |
|------------------------|--------|-------------------------|--------------------|------------------------|-------------------------|--------------------|------------------------|
|                        |        | Sites (bp) <sup>1</sup> | Hets. <sup>2</sup> | $\pi$ , % <sup>3</sup> | Sites (bp) <sup>1</sup> | Hets. <sup>2</sup> | $\pi$ , % <sup>3</sup> |
| 93A009 Flint (male)    | Blood  | 921,130                 | 788                | 0.086%                 | 427,442                 | 0                  | 0.000%                 |
|                        | Fecal  |                         | 775                | 0.084%                 |                         | 5                  | 0.001%                 |
| A2A009 Sopulu (male)   | Blood  | 929,796                 | 919                | 0.099%                 | 438,456                 | 1                  | 0.000%                 |
|                        | Fecal  |                         | 914                | 0.098%                 |                         | 2                  | 0.000%                 |
| X161 Judd (male)       | Blood  | 946,724                 | 779                | 0.082%                 | 453,236                 | 2                  | 0.000%                 |
|                        | Fecal  |                         | 776                | 0.082%                 |                         | 2                  | 0.000%                 |
| 91A016 Coty (male)     | Blood  | 935,620                 | 806                | 0.086%                 | 450,731                 | 3                  | 0.001%                 |
|                        | Fecal  |                         | 784                | 0.084%                 |                         | 1                  | 0.000%                 |
| 91A010 Peanut (female) | Blood  | 898,166                 | 717                | 0.080%                 | 457,102                 | 172                | 0.038%                 |
|                        | Fecal  |                         | 707                | 0.079%                 |                         | 161                | 0.035%                 |
| A1A005 Kierra (female) | Blood  | 901,558                 | 893                | 0.099%                 | 446,120                 | 153                | 0.034%                 |
|                        | Fecal  |                         | 885                | 0.098%                 |                         | 147                | 0.033%                 |

<sup>1</sup> Number of sites with filtered read coverage sufficient for SNP identification from each of the fecal DNA and blood DNA sequencing data from each individual.

<sup>2</sup> Number of heterozygous sites in each sample identified using the criteria described in *Materials and Methods* (the X chromosome heterozygous sites in males are false positives).

<sup>3</sup> Pairwise nucleotide diversity, the percentage of heterozygous sites ( $\pi$  for the X chromosome in males is an approximation of the false-positive error rate).
